# Supplementary material for: Responsiveness to Sugar Solutions in the Moth Agrotis ipsilon: Parameters Affecting Proboscis Extension
Source: PubMed Central journal article supplement (PMC6888557; doi:10.3389/fphys.2019.01423), 2019-11-26
Supplement: Data_Sheet_1.pdf [file Data_Sheet_1.pdf]

## **SUPPLEMENTARY DATA**

**Supplementary Tables S1-12** report the details of statistics for Figure 1-6.

**Supplementary Figures S1-6** report the same data as Figures 1-6, but with the animals spontaneously responding to water.

**Supplementary Tables S13-24** report the details of statistics for Supplementary Figures S1-6.

|                                                 |                                          | Sucrose concentration |       |       |         |         |         |        |       |
|-------------------------------------------------|------------------------------------------|-----------------------|-------|-------|---------|---------|---------|--------|-------|
|                                                 |                                          | 0%                    | 0.1%  | 0.3%  | 1%      | 3%      | 10%     | 30%    | 0%    |
| <b>Global tests</b>                             | 4 degrees of freedom $\chi^2$            |                       |       |       | 37.268  | 37.01   | 18.49   | 15.138 |       |
|                                                 | $\chi^2$ p-value                         |                       |       |       | < 0.001 | < 0.001 | < 0.001 | 0.004  |       |
|                                                 | Fisher's exact test p-value              | 1                     | 0.149 | 0.126 |         |         |         |        | 0.163 |
| <b>Pairwise comparisons (adjusted p-values)</b> | 5days/unfed 5days vs. 5days /unfed 3days |                       |       |       | 0.175   | 1       | 1       | 0.677  |       |
|                                                 | 5days/unfed 5days vs. 5days /fed         |                       |       |       | < 0.001 | 0.124   | 0.184   | 0.614  |       |
|                                                 | 5days/unfed 5days vs. 3days/unfed 3days  |                       |       |       | 0.091   | 1       | 1       | 1      |       |
|                                                 | 5days/unfed 5days vs. 3days /fed         |                       |       |       | < 0.001 | < 0.001 | 0.054   | 0.677  |       |
|                                                 | 5days /unfed 3days vs. 5days/fed         |                       |       |       | 0.050   | 0.026   | 0.051   | 0.013  |       |
|                                                 | 5days /unfed 3days vs. 3days/unfed 3days |                       |       |       | 0.880   | 1       | 1       | 0.677  |       |
|                                                 | 5days /unfed 3days vs. 3days/fed         |                       |       |       | 0.002   | < 0.001 | 0.010   | 0.026  |       |
|                                                 | 5days /fed vs. 3days/unfed 3days         |                       |       |       | 0.166   | 0.011   | 0.174   | 0.614  |       |
|                                                 | 5days /fed vs. 3days/fed                 |                       |       |       | 0.880   | 0.159   | 1       | 1      |       |
|                                                 | 3days/unfed 3days vs. 3days /fed         |                       |       |       | 0.015   | < 0.001 | 0.051   | 0.677  |       |

Supplementary Table S1. Detailed analysis of data from Figure 1A.

|                                                                         |                                          | Sucrose concentration |       |       |        |         |       |       |       |
|-------------------------------------------------------------------------|------------------------------------------|-----------------------|-------|-------|--------|---------|-------|-------|-------|
|                                                                         |                                          | 0%                    | 0.1%  | 0.3%  | 1%     | 3%      | 10%   | 30%   | 0%    |
| <b>Males vs. females<br/>(both 5days/unfed<br/>5days)</b>               | 1 degree of freedom $\chi^2$             |                       |       | 6.358 | 3.283  | 0.010   |       |       | 0.213 |
|                                                                         | $\chi^2$ p-value                         |                       |       | 0.012 | 0.070  | .919    |       |       | 0.644 |
|                                                                         | Fisher's exact test p-value              | 1                     | 0.022 |       |        |         | 1     | 1     |       |
|                                                                         |                                          | 0%                    | 0.1%  | 0.3%  | 1%     | 3%      | 10%   | 30%   | 0%    |
| <b>Global tests between<br/>females</b>                                 | 4 degrees of freedom $\chi^2$            |                       |       |       | 10.398 | 23.744  | 4.065 |       | 4.970 |
|                                                                         | $\chi^2$ p-value                         |                       |       |       | 0.034  | < 0.001 | 0.397 |       | 0.290 |
|                                                                         | Fisher's exact test p-value              | 1                     | 0.231 | 0.046 |        |         |       | 0.020 |       |
|                                                                         |                                          | 0%                    | 0.1%  | 0.3%  | 1%     | 3%      | 10%   | 30%   | 0%    |
| <b>Pairwise comparisons<br/>between females<br/>(adjusted p-values)</b> | 5days/unfed 5days vs. 5days /unfed 3days |                       |       | 1     | 1      | 0.036   |       | 1     |       |
|                                                                         | 5days/unfed 5days vs. 5days /fed         |                       |       | 0.699 | 0.056  | < 0.001 |       | 0.272 |       |
|                                                                         | 5days/unfed 5days vs. 3days/unfed 3days  |                       |       | 1     | 1      | 0.258   |       | 1     |       |
|                                                                         | 5days/unfed 5days vs. 3days /fed         |                       |       | 1     | 1      | 0.001   |       | 1     |       |
|                                                                         | 5days /unfed 3days vs. 5days/fed         |                       |       | 0.483 | 0.121  | 0.275   |       | 1     |       |
|                                                                         | 5days /unfed 3days vs. 3days/unfed 3days |                       |       | 1     | 1      | 0.820   |       | 1     |       |
|                                                                         | 5days /unfed 3days vs. 3days/fed         |                       |       | 0.981 | 1      | 0.755   |       | 1     |       |
|                                                                         | 5days /fed vs. 3days/unfed 3days         |                       |       | 0.134 | 0.020  | 0.069   |       | 1     |       |
|                                                                         | 5days /fed vs. 3days/fed                 |                       |       | 1     | 0.331  | 0.820   |       | 0.272 |       |
| 3days/unfed 3days vs. 3days /fed                                        |                                          |                       | 0.463 | 1     | 0.275  |         | 1     |       |       |

Supplementary Table S2. Detailed analysis of data from Figure 1B.

|                                                 |                                | Sucrose concentration |       |       |        |         |         |       |       |
|-------------------------------------------------|--------------------------------|-----------------------|-------|-------|--------|---------|---------|-------|-------|
|                                                 |                                | 0%                    | 0.1%  | 0.3%  | 1%     | 3%      | 10%     | 30%   | 0%    |
| <b>Global tests</b>                             | 3 degrees of freedom $\chi^2$  |                       | 5.672 | 4.314 | 15.581 | 37.939  |         |       | 4.686 |
|                                                 | $\chi^2$ p-value               |                       | 0.129 | 0.229 | 0.001  | < 0.001 |         |       | 0.196 |
|                                                 | Fisher's exact test p-value    | 1                     |       |       |        |         | < 0.001 | 0.201 |       |
| <b>Pairwise comparisons (adjusted p-values)</b> | Unfed control vs. unfed random |                       |       |       | 0.37   | 0.71    | 1       |       |       |
|                                                 | Unfed control vs. fed control  |                       |       |       | 0.282  | < 0.001 | 0.094   |       |       |
|                                                 | Unfed control vs. fed random   |                       |       |       | 0.282  | < 0.001 | 0.078   |       |       |
|                                                 | Unfed random vs. fed control   |                       |       |       | 0.012  | < 0.001 | 0.030   |       |       |
|                                                 | Unfed random vs. fed random    |                       |       |       | 0.006  | < 0.001 | 0.010   |       |       |
|                                                 | Fed control vs. fed random     |                       |       |       | 0.707  | 0.710   | 1       |       |       |

**Supplementary Table S3.** Detailed analysis of data from Figure 2A.

|                     |                               | Sucrose concentration |       |       |       |       |       |       |      |
|---------------------|-------------------------------|-----------------------|-------|-------|-------|-------|-------|-------|------|
|                     |                               | 0%                    | 0.1%  | 0.3%  | 1%    | 3%    | 10%   | 30%   | 0%   |
| <b>Global tests</b> | 3 degrees of freedom $\chi^2$ |                       |       |       |       | 1.345 | 2.666 | 1.610 |      |
|                     | $\chi^2$ p-value              |                       |       |       |       | 0.718 | 0.446 | 0.657 |      |
|                     | Fisher's exact test p-value   | 1                     | 0.064 | 0.068 | 0.417 |       |       |       | .733 |

**Supplementary Table S4.** Detailed analysis of data from Figure 2B.

|                                               |                              | Sucrose concentration |       |        |         |         |        |       |         |
|-----------------------------------------------|------------------------------|-----------------------|-------|--------|---------|---------|--------|-------|---------|
|                                               |                              | 0%                    | 0.1%  | 0.3%   | 1%      | 3%      | 10%    | 30%   | 0%      |
| <b>Antennal stimulated vs. leg stimulated</b> | 1 degree of freedom $\chi^2$ |                       | 8.011 | 10.634 | 20.267  | 23.945  |        |       | 12.267  |
|                                               | $\chi^2$ p-value             |                       | 0.005 | 0.001  | < 0.001 | < 0.001 |        |       | < 0.001 |
|                                               | Fisher's exact test p-value  | 1                     |       |        |         |         | 0.0002 | 0.001 |         |
|                                               |                              | 0%                    | 0.1%  | 0.3%   | 1%      | 3%      | 10%    | 30%   | 0%      |
| <b>Antennal stimulation in both groups</b>    | 1 degree of freedom $\chi^2$ |                       | 1.609 | 1.267  | 0.003   |         |        |       | 0.069   |
|                                               | $\chi^2$ p-value             |                       | 0.205 | 0.260  | 0.955   |         |        |       | 0.792   |
|                                               | Fisher's exact test p-value  | 1                     |       |        |         | 0.709   | 0.474  | 0.474 |         |

Supplementary Table S5. Detailed analysis of data from Figure 3.

|                                                        |                              | Sucrose concentration |       |       |       |       |       |       |       |
|--------------------------------------------------------|------------------------------|-----------------------|-------|-------|-------|-------|-------|-------|-------|
|                                                        |                              | 0%                    | 0.1%  | 0.3%  | 1%    | 3%    | 10%   | 30%   | 0%    |
| <b>Comparison before proboscis stimulation</b>         | 1 degree of freedom $\chi^2$ |                       |       |       | 2.375 | 0.472 | 0.075 | 0.472 |       |
|                                                        | $\chi^2$ p-value             |                       |       |       | 0.123 | 0.492 | 0.785 | 0.492 |       |
|                                                        | Fisher's exact test p-value  | 1                     | 0.421 | 0.507 |       |       |       |       | 0.349 |
|                                                        |                              | 0%                    | 0.1%  | 0.3%  | 1%    | 3%    | 10%   | 30%   | 0%    |
| <b>Comparison before and after water stimulation</b>   | McNemar's test               | 0                     | 0     | 0     | 0     | 0     | 0     | 0     | 0     |
|                                                        | McNemar's test p-value       | 1                     | 1     | 1     | 1     | 1     | 1     | 1     | 1     |
|                                                        |                              | 0%                    | 0.1%  | 0.3%  | 1%    | 3%    | 10%   | 30%   | 0%    |
| <b>Comparison before and after quinine stimulation</b> | McNemar's test               | 0                     | 0.333 | 0.667 | 3.571 | 3.267 | 9.783 | 8.000 | 1.000 |
|                                                        | McNemar's test p-value       | 1                     | 0.564 | 0.414 | 0.059 | 0.071 | 0.002 | 0.005 | 0.317 |

Supplementary Table S6. Detailed analysis of data from Figure 4A.

|                    |                              | Sucrose concentration |       |       |         |         |         |         |       |
|--------------------|------------------------------|-----------------------|-------|-------|---------|---------|---------|---------|-------|
|                    |                              | 0%                    | 0.1%  | 0.3%  | 1%      | 3%      | 10%     | 30%     | 0%    |
| <b>Global test</b> | 1 degree of freedom $\chi^2$ |                       |       |       | 21.582  | 63.828  | 83.977  | 68.646  |       |
|                    | $\chi^2$ p-value             |                       |       |       | < 0.001 | < 0.001 | < 0.001 | < 0.001 |       |
|                    | Fisher's exact test p-value  | 1.000                 | 0.011 | 0.024 |         |         |         |         | 0.052 |

**Supplementary Table S7.** Detailed analysis of data from Figure 4B.



|                                                 |                               | Sugar concentration |       |         |         |       |        |       |       |
|-------------------------------------------------|-------------------------------|---------------------|-------|---------|---------|-------|--------|-------|-------|
|                                                 |                               | 0%                  | 0.1%  | 0.3%    | 1%      | 3%    | 10%    | 30%   | 0%    |
| <b>Global tests</b>                             | 3 degrees of freedom $\chi^2$ |                     |       | 23.811  | 24.825  | 8.874 | 12.002 |       |       |
|                                                 | $\chi^2$ p-value              |                     |       | < 0.001 | < 0.001 | 0.012 | 0.002  |       |       |
|                                                 | Fisher's exact test p-value   | 1.000               | 0.002 |         |         |       |        | 0.003 | 0.430 |
| <b>Pairwise comparisons (adjusted p-values)</b> |                               | 0%                  | 0.1%  | 0.3%    | 1%      | 3%    | 10%    | 30%   | 0%    |
|                                                 | Sucrose vs. Fructose          |                     | 1.000 | 0.015   | 0.046   | 0.068 | 0.003  | 0.041 |       |
|                                                 | Sucrose vs. Sucrose/Fructose  |                     | 0.030 | 0.015   | 0.003   | 0.463 | 0.217  | 1.000 |       |
|                                                 | Fructose vs. Sucrose/Fructose |                     | 0.016 | < 0.001 | < 0.001 | 0.015 | 0.217  | 0.014 |       |

Supplementary Table S8. Detailed analysis of data from Figure 5A.

|                                                 |                               | Sugar concentration |       |       |         |         |         |         |         |
|-------------------------------------------------|-------------------------------|---------------------|-------|-------|---------|---------|---------|---------|---------|
|                                                 |                               | 0%                  | 0.1%  | 0.3%  | 1%      | 3%      | 10%     | 30%     | 0%      |
| <b>Global tests</b>                             | 3 degrees of freedom $\chi^2$ |                     | 8.025 | 8.184 | 19.17   | 41.776  | 50.648  |         | 8.673   |
|                                                 | $\chi^2$ p-value              |                     | 0.018 | 0.017 | < 0.001 | < 0.001 | < 0.001 |         | 0.013   |
|                                                 | Fisher's exact test p-value   | 1                   |       |       |         |         |         |         | < 0.001 |
| <b>Pairwise comparisons (adjusted p-values)</b> |                               | 0%                  | 0.1%  | 0.3%  | 1%      | 3%      | 10%     | 30%     | 0%      |
|                                                 | Sucrose vs. Glucose           |                     | 0.017 | 0.020 | < 0.001 | < 0.001 | < 0.001 | < 0.001 | 0.022   |
|                                                 | Sucrose vs. Sucrose/Glucose   |                     | 0.956 | 0.974 | 0.813   | 0.805   | 0.686   | 1.000   | 0.737   |
|                                                 | Glucose vs. Sucrose/Glucose   |                     | 0.017 | 0.020 | < 0.001 | < 0.001 | < 0.001 | < 0.001 | 0.012   |

**Supplementary Table S9.** Detailed analysis of data from Figure 5B.

|                                                 |                               | Sugar concentration |       |      |      |         |         |       |       |
|-------------------------------------------------|-------------------------------|---------------------|-------|------|------|---------|---------|-------|-------|
|                                                 |                               | 0%                  | 0.1%  | 0.3% | 1%   | 3%      | 10%     | 30%   | 0%    |
| <b>Global tests</b>                             | 3 degrees of freedom $\chi^2$ |                     |       |      |      | 17.107  | 16.122  | 6.52  | 0.259 |
|                                                 | $\chi^2$ p-value              |                     |       |      |      | < 0.001 | < 0.001 | 0.038 | .879  |
|                                                 | Fisher's exact test p-value   | 1                   | 0.051 | .588 | .680 |         |         |       |       |
| <b>Pairwise comparisons (adjusted p-values)</b> |                               | 0%                  | 0.1%  | 0.3% | 1%   | 3%      | 10%     | 30%   | 0%    |
|                                                 | Fructose vs. Glucose          |                     |       |      |      | < 0.001 | 0.001   | 0.335 |       |
|                                                 | Glucose vs. Fructose/Glucose  |                     |       |      |      | 0.031   | 0.001   | 0.055 |       |
|                                                 | Fructose vs. Fructose/Glucose |                     |       |      |      | 0.049   | 0.980   | 0.490 |       |

**Supplementary Table S10.** Detailed analysis of data from Figure 5C.

|                                                 |                               | Sugar concentration |       |        |         |         |         |         |         |
|-------------------------------------------------|-------------------------------|---------------------|-------|--------|---------|---------|---------|---------|---------|
|                                                 |                               | 0%                  | 0.1%  | 0.3%   | 1%      | 3%      | 10%     | 30%     | 0%      |
| <b>Global tests</b>                             | 4 degrees of freedom $\chi^2$ |                     |       | 13.762 | 21.806  | 54.211  | 31.305  |         | 3.224   |
|                                                 | $\chi^2$ p-value              |                     |       | 0.003  | < 0.001 | < 0.001 | < 0.001 |         | 0.358   |
|                                                 | Fisher's exact test p-value   | 1                   | 0.578 |        |         |         |         |         | < 0.001 |
| <b>Pairwise comparisons (adjusted p-values)</b> |                               | 0%                  | 0.1%  | 0.3%   | 1%      | 3%      | 10%     | 30%     | 0%      |
|                                                 | Sucrose vs. Glucose           |                     |       | 0.072  | < 0.001 | < 0.001 | < 0.001 | < 0.001 |         |
|                                                 | Sucrose vs. Fructose          |                     |       | 0.009  | 0.040   | 0.016   | 0.850   | 0.726   |         |
|                                                 | Sucrose vs. Mixture           |                     |       | 0.598  | 0.307   | 0.151   | 1.000   | 0.726   |         |
|                                                 | Glucose vs. Fructose          |                     |       | 0.600  | 0.068   | < 0.001 | < 0.001 | 0.045   |         |
|                                                 | Glucose vs. Mixture           |                     |       | 0.490  | 0.002   | < 0.001 | < 0.001 | 0.045   |         |
|                                                 | Fructose vs. Mixture          |                     |       | 0.235  | 0.221   | 0.291   | 1.000   | 1.000   |         |

Supplementary Table S11. Detailed analysis of data from Figure 5D.

|                                                                 |                                               | Sugar concentration |             |             |           |           |            |            |           |
|-----------------------------------------------------------------|-----------------------------------------------|---------------------|-------------|-------------|-----------|-----------|------------|------------|-----------|
|                                                                 |                                               | 0%                  | 0.1%        | 0.3%        | 1%        | 3%        | 10%        | 30%        | 0%        |
| <b>Males vs. females (sucrose)</b>                              | 1 degree of freedom $\chi^2$                  |                     | 0.033       | 0.091       | 0.063     | 0.034     |            |            | 0.012     |
|                                                                 | $\chi^2$ p-value                              |                     | .855        | .763        | .801      | .853      |            |            | .913      |
|                                                                 | Fisher's exact test p-value                   |                     |             |             |           |           | 0.060      | 0.060      |           |
|                                                                 |                                               | <b>0%</b>           | <b>0.1%</b> | <b>0.3%</b> | <b>1%</b> | <b>3%</b> | <b>10%</b> | <b>30%</b> | <b>0%</b> |
| <b>Global tests between females</b>                             | 4 degrees of freedom $\chi^2$                 |                     |             | 8.344       | 35.956    | 70.795    | 68.228     |            | 8.344     |
|                                                                 | $\chi^2$ p-value                              |                     |             | 0.080       | < 0.001   | < 0.001   | < 0.001    |            | 0.080     |
|                                                                 | Fisher's exact test p-value                   |                     | 0.524       |             |           |           |            | 0.004      |           |
|                                                                 |                                               | <b>0%</b>           | <b>0.1%</b> | <b>0.3%</b> | <b>1%</b> | <b>3%</b> | <b>10%</b> | <b>30%</b> | <b>0%</b> |
| <b>Pairwise comparisons between females (adjusted p-values)</b> | Sucrose vs. Fructose                          |                     |             |             | 0.818     | 1.000     | 1.000      | 0.420      |           |
|                                                                 | Sucrose vs. Sucrose/Fructose                  |                     |             |             | 0.818     | 1.000     | 1.000      | 0.113      |           |
|                                                                 | Sucrose vs. Sucrose/Fructose/Glucose          |                     |             |             | 0.301     | 1.000     | 1.000      | 0.814      |           |
|                                                                 | Sucrose vs. Glucose                           |                     |             |             | < 0.001   | < 0.001   | < 0.001    | 1.000      |           |
|                                                                 | Fructose vs. Sucrose/Fructose                 |                     |             |             | 0.197     | 1.000     | 1.000      | 1.000      |           |
|                                                                 | Fructose vs. Sucrose/Fructose/Glucose         |                     |             |             | 0.029     | 1.000     | 1.000      | 1.000      |           |
|                                                                 | Fructose vs. Glucose                          |                     |             |             | 0.003     | < 0.001   | < 0.001    | 0.355      |           |
|                                                                 | Sucrose/Fructose vs. Sucrose/Fructose/Glucose |                     |             |             | 0.818     | 1.000     | 1.000      | 0.951      |           |
|                                                                 | Sucrose/Fructose vs. Glucose                  |                     |             |             | < 0.001   | < 0.001   | < 0.001    | 0.064      |           |
|                                                                 | Sucrose/Fructose/Glucose vs. Glucose          |                     |             |             | < 0.001   | < 0.001   | < 0.001    | 0.814      |           |

Supplementary Table S12. Detailed analysis of data from Figure 6.

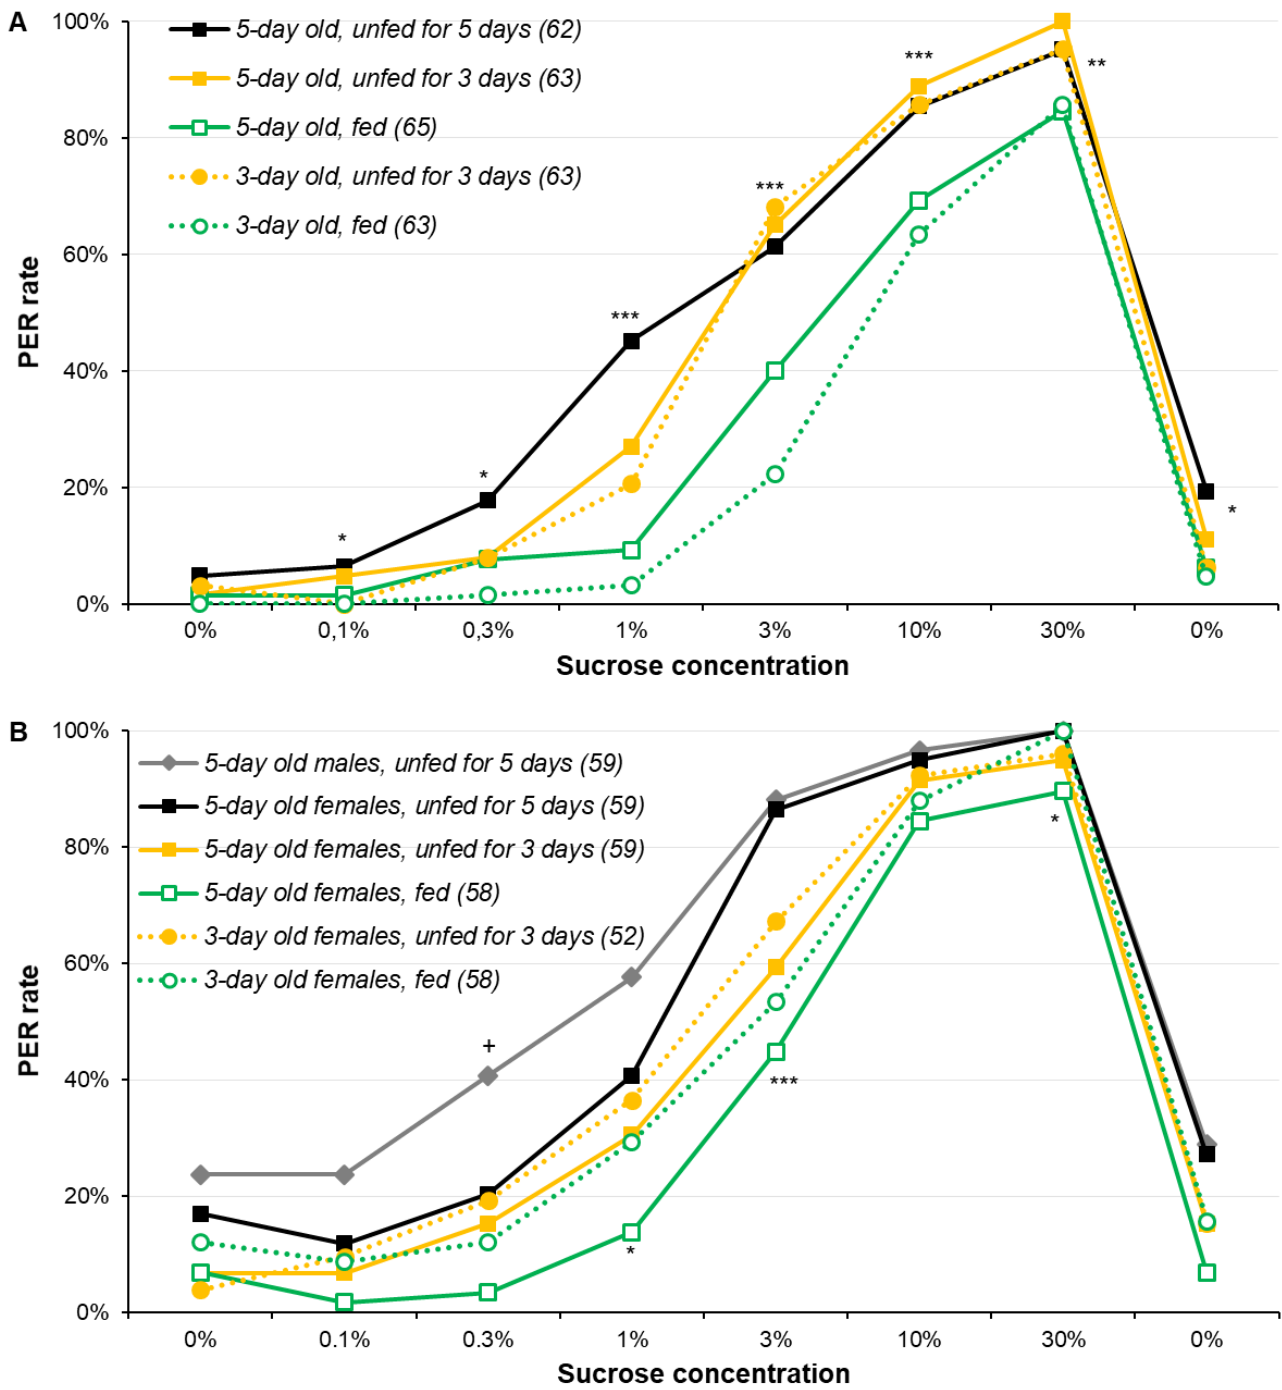

**Supplementary Figure S1: data of Figure 1 including animals spontaneously responding to water.** Details of the analyses are reported in Supplementary Tables S13 and S14. All other details as in Figure 1.

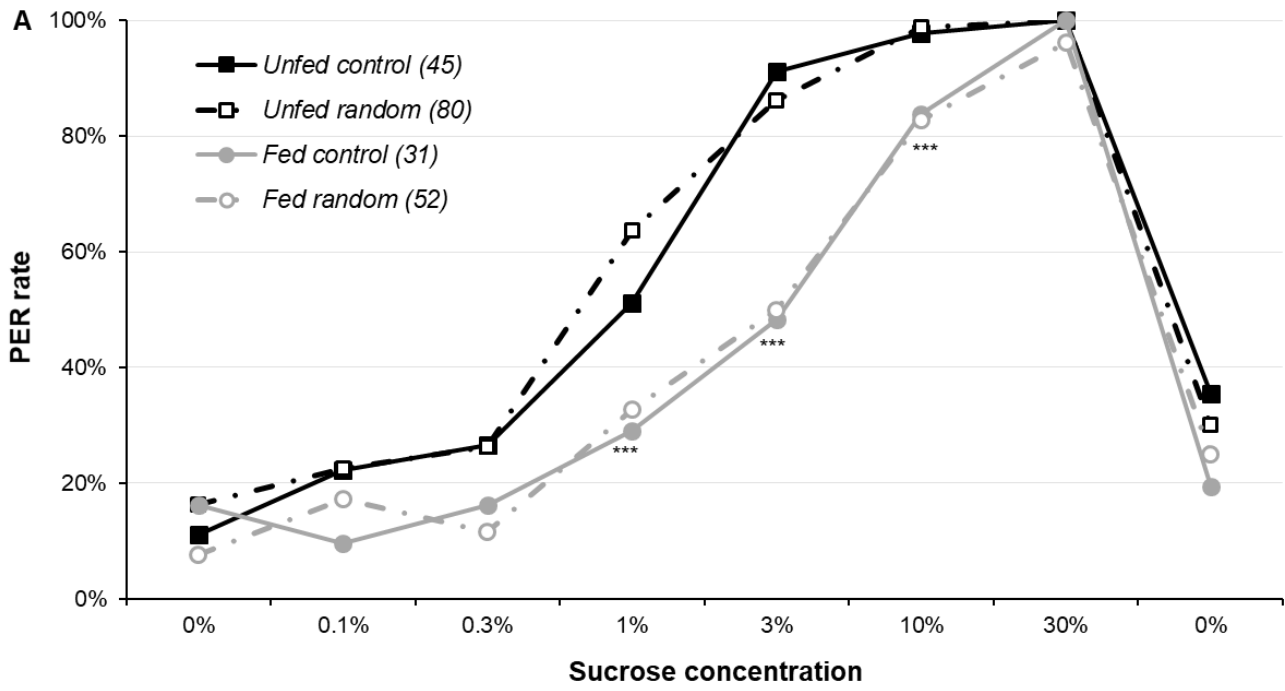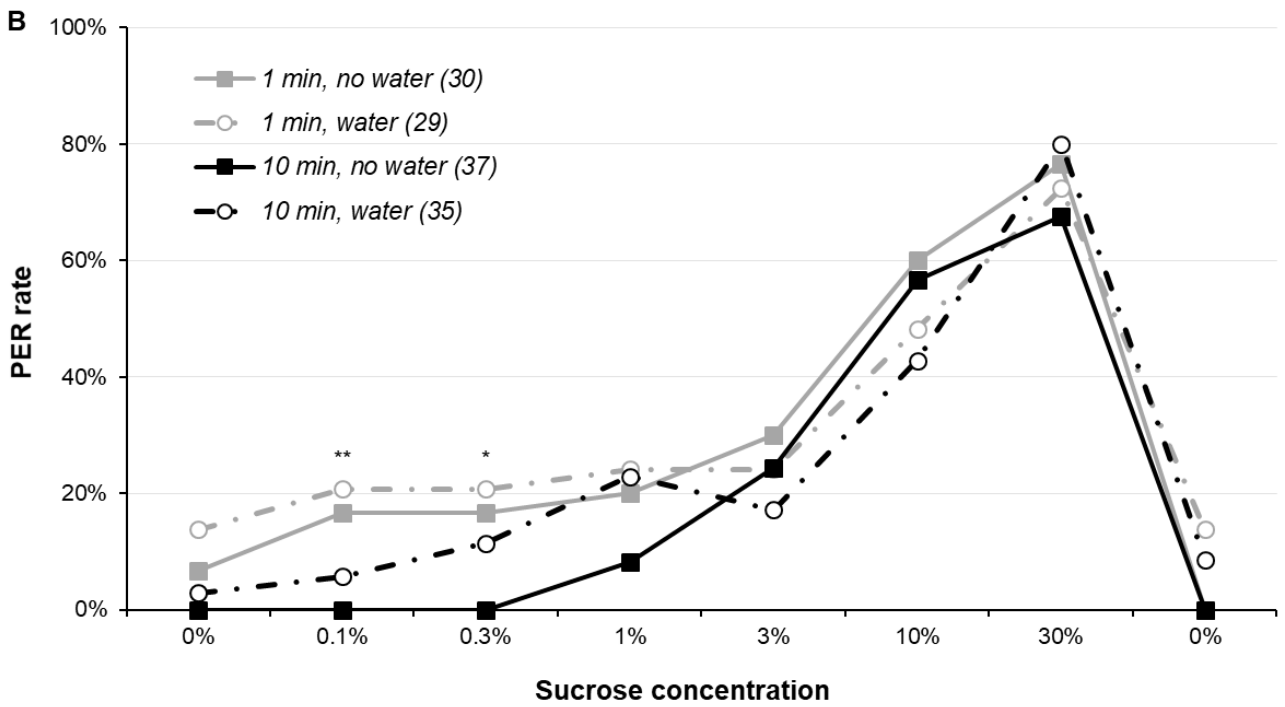

**Supplementary Figure S2: data of Figure 2 including animals spontaneously responding to water.** Details of the analyses are reported in Supplementary Tables S15 and S16. All other details as in Figure 2.

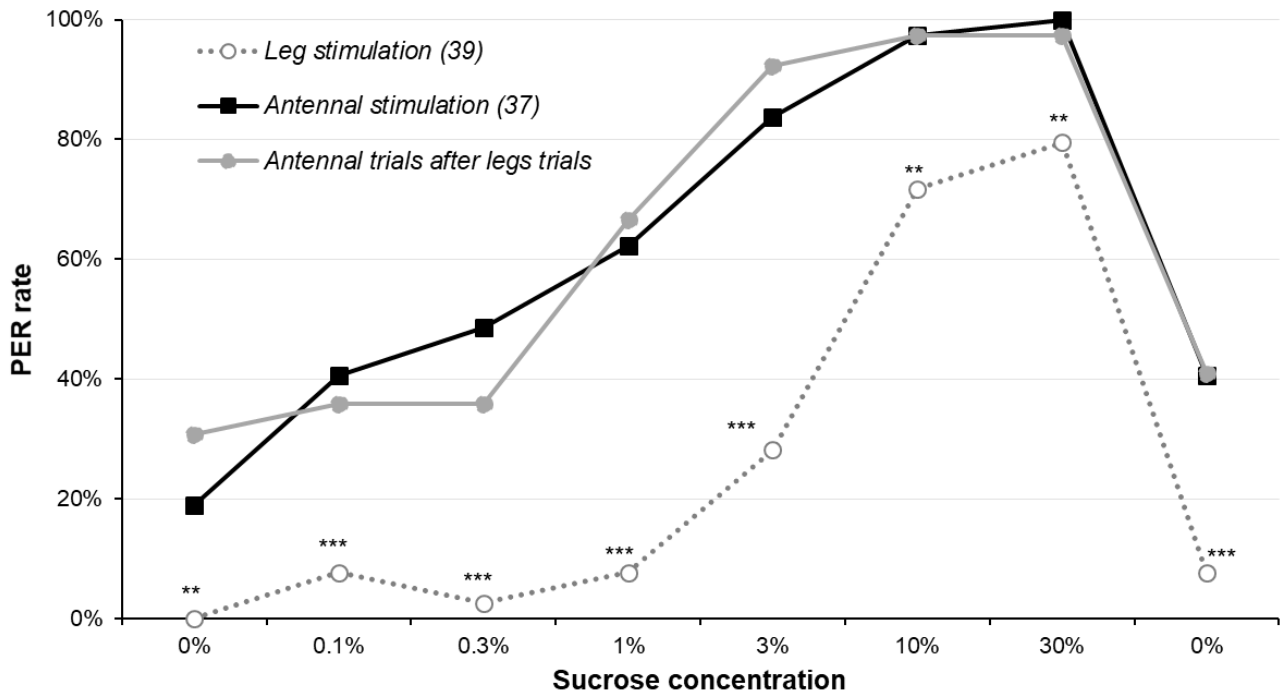

**Supplementary Figure S3: data of Figure 3 including animals spontaneously responding to water.** Details of the analyses are reported in Supplementary Table S17. All other details as in Figure 3.



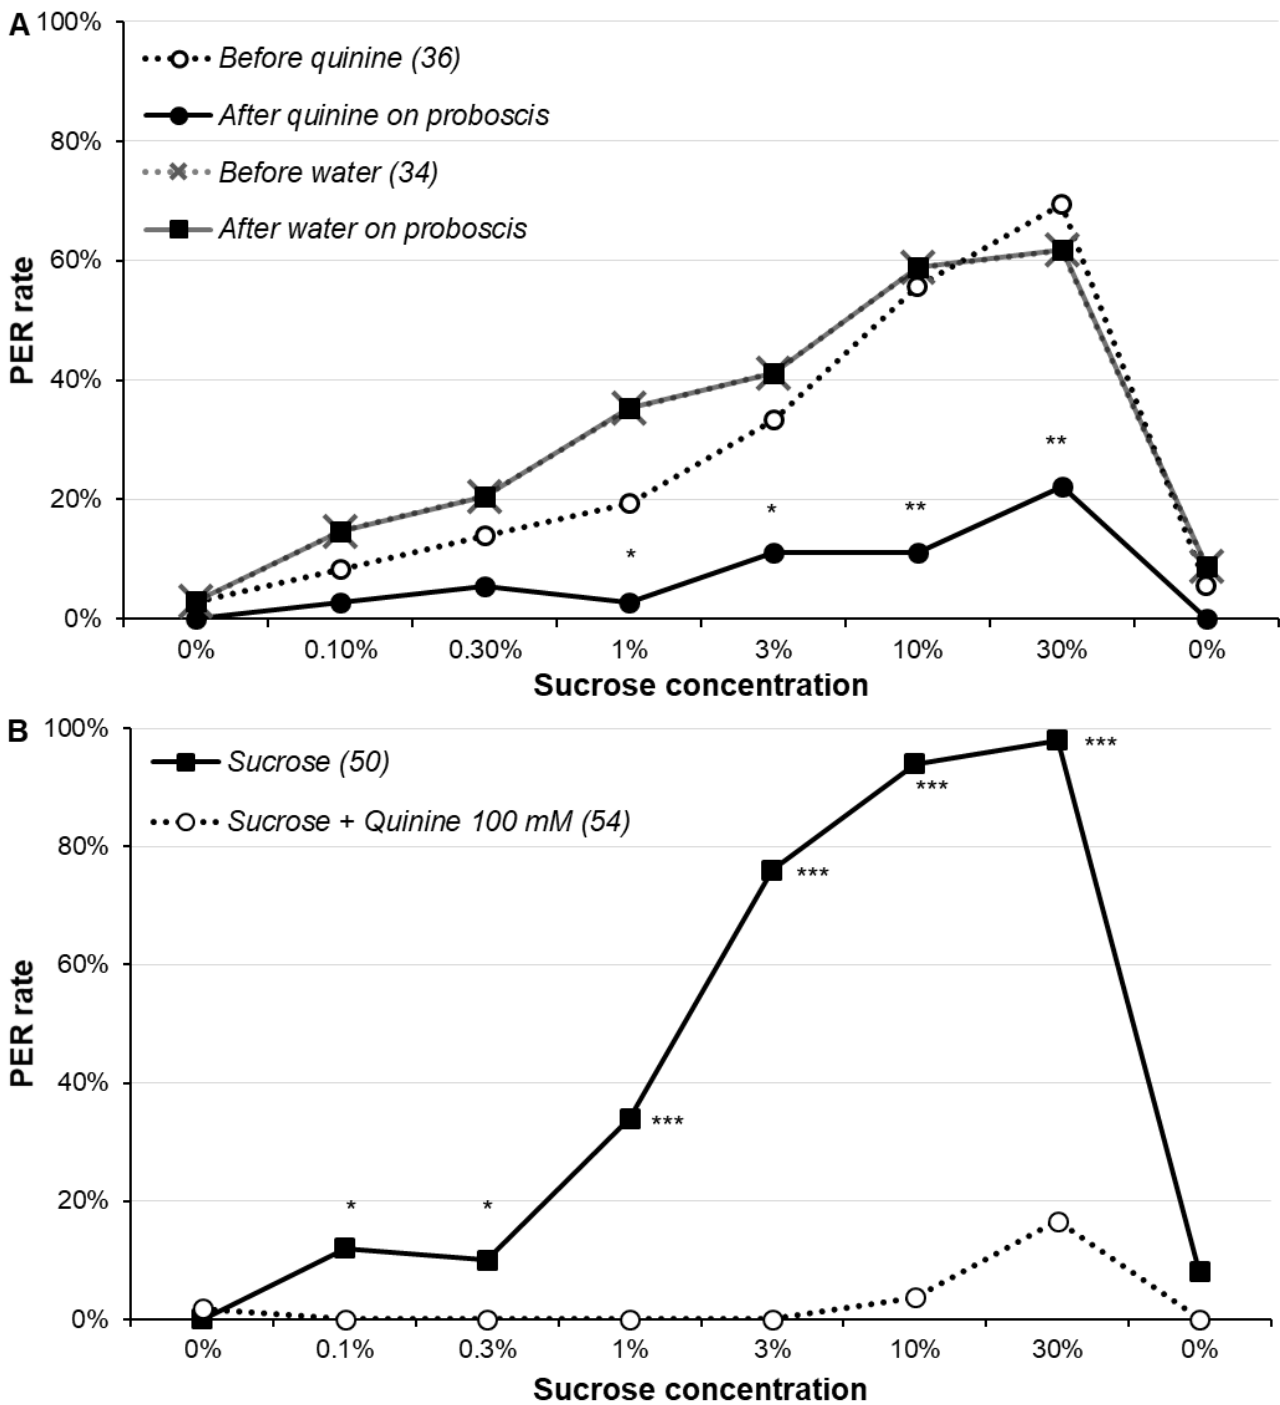

**Supplementary Figure S4: data of Figure 4 including animals spontaneously responding to water.** In part A, stars denote a significant difference between the PER rate before and after touching the proboscis with quinine, i.e. a significant rate of proboscis retraction (McNemar’s test; \*:  $p < 0.050$ , \*\*:  $p < 0.010$ ), and details of the analyses are reported in Supplementary Tables S18. In part B, stars denote a significant difference between the PER rate of the two groups ( $\chi^2$ ; \*:  $p < 0.050$ , \*\*\*:  $p < 0.001$ ), and details of the analyses are reported in Supplementary Tables S19. All other details as in Figure 4.

## Sugar responsiveness in moths

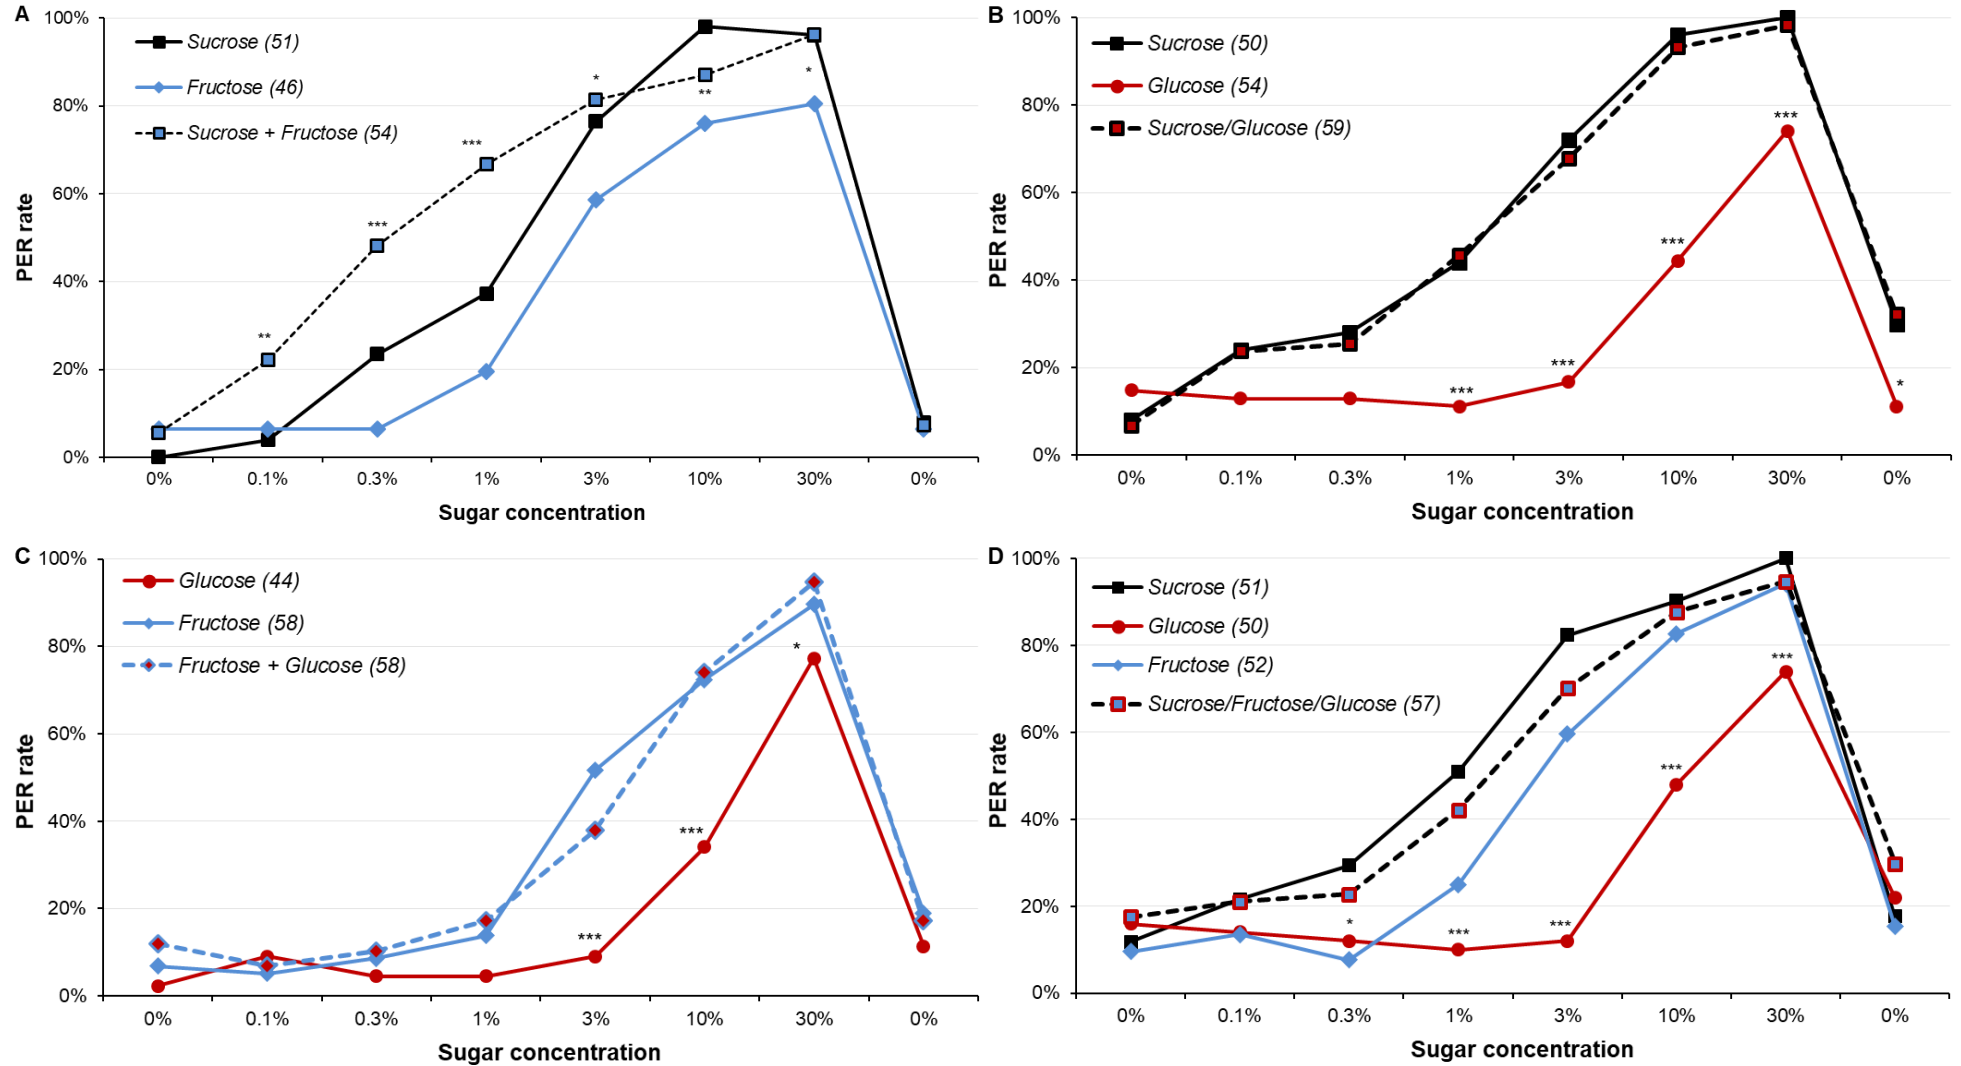

**Supplementary Figure S5: data of Figure 5 including animals spontaneously responding to water.** Details of the analyses are reported in Supplementary Tables S20 to S23. All other details as in Figure 5.

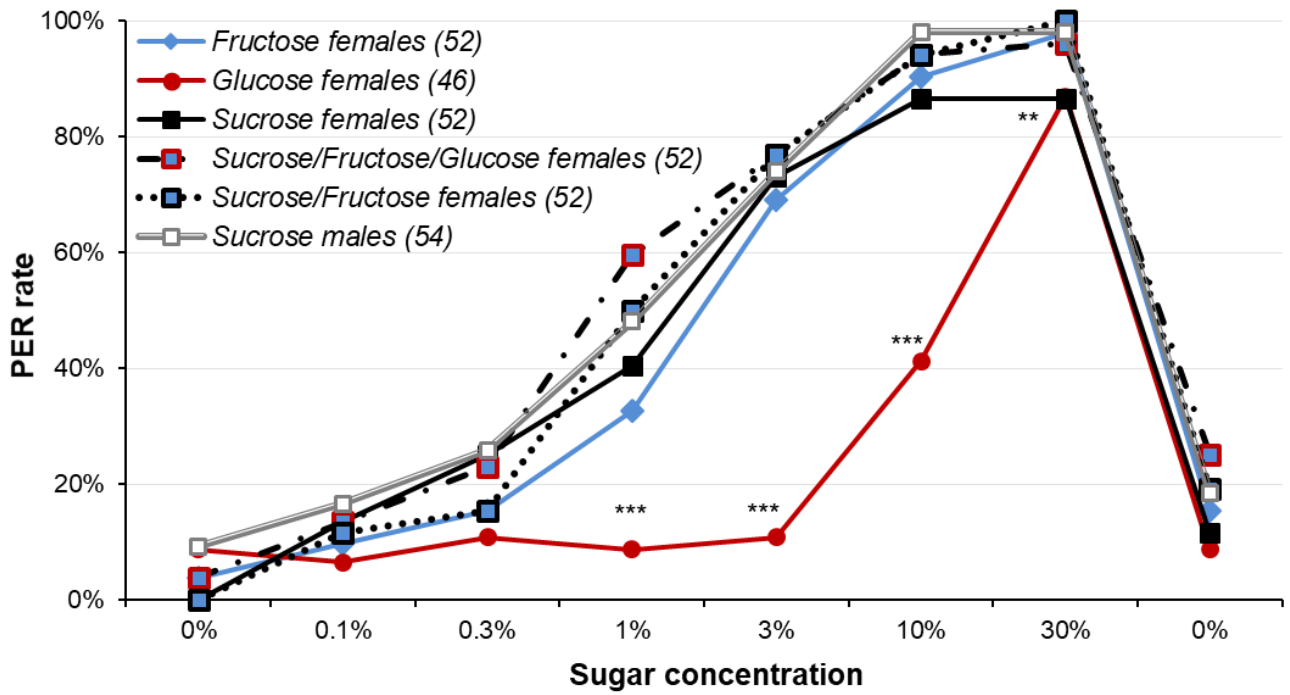

**Supplementary Figure S6: data of Figure 6 including animals spontaneously responding to water.** Details of the analyses are reported in Supplementary Tables S24. All other details as in Figure 6.

|                                                 |                                          | Sucrose concentration |       |         |         |         |         |       |        |
|-------------------------------------------------|------------------------------------------|-----------------------|-------|---------|---------|---------|---------|-------|--------|
|                                                 |                                          | 0%                    | 0.1%  | 0.3%    | 1%      | 3%      | 10%     | 30%   | 0%     |
| <b>Global tests</b>                             | 4 degrees of freedom $\chi^2$            |                       |       | 10.734  | 40.835  | 39.155  | 19.467  |       | 10.419 |
|                                                 | $\chi^2$ p-value                         |                       |       | 0.030   | < 0.001 | < 0.001 | < 0.001 |       | 0.034  |
|                                                 | Fisher's exact test p-value              | 0.352                 | 0.042 |         |         |         |         | 0.002 |        |
|                                                 |                                          | 0%                    | 0.1%  | 0.3%    | 1%      | 3%      | 10%     | 30%   | 0%     |
| <b>Pairwise comparisons (adjusted p-values)</b> | 5days/unfed 5days vs. 5days /unfed 3days | 1                     | 1     | 0.165   | 1       | 1       | 0.714   | 1     | 1      |
|                                                 | 5days/unfed 5days vs. 5days /fed         | 1                     | 1     | < 0.001 | 0.082   | 0.156   | 0.611   | 0.291 | 1      |
|                                                 | 5days/unfed 5days vs. 3days/unfed 3days  | 0.576                 | 1     | 0.030   | 1       | 1       | 1       | 0.291 | 0.576  |
|                                                 | 5days/unfed 5days vs. 3days /fed         | 0.576                 | 0.021 | < 0.001 | < 0.001 | 0.039   | 0.714   | 0.139 | 0.576  |
|                                                 | 5days /unfed 3days vs. 5days/fed         | 1                     | 1     | 0.056   | 0.027   | 0.045   | 0.013   | 1     | 1      |
|                                                 | 5days /unfed 3days vs. 3days/unfed 3days | 1                     | 1     | 0.548   | 1       | 1       | 0.732   | 1     | 1      |
|                                                 | 5days /unfed 3days vs. 3days/fed         | 1                     | 1     | 0.002   | < 0.001 | 0.008   | 0.026   | 1     | 1      |
|                                                 | 5days /fed vs. 3days/unfed 3days         | 1                     | 1     | 0.254   | 0.009   | 0.156   | 0.611   | 1     | 1      |
|                                                 | 5days /fed vs. 3days/fed                 | 1                     | 1     | 0.548   | 0.120   | 1       | 1       | 1     | 1      |
| 3days/unfed 3days vs. 3days /fed                | 1                                        | 1                     | 0.030 | < 0.001 | 0.037   | 0.714   | 1       | 1     |        |

**Supplementary Table S13.** Detailed analysis of data from Supplementary Figure S1A.

|                                                                         |                                          | Sucrose concentration |       |       |        |         |       |       |       |
|-------------------------------------------------------------------------|------------------------------------------|-----------------------|-------|-------|--------|---------|-------|-------|-------|
|                                                                         |                                          | 0%                    | 0.1%  | 0.3%  | 1%     | 3%      | 10%   | 30%   | 0%    |
| <b>Males vs. females<br/>(both 5days/unfed<br/>5days)</b>               | 1 degree of freedom $\chi^2$             | 0.837                 | 2.839 | 5.756 | 3.391  | 0.076   |       |       | 0.042 |
|                                                                         | $\chi^2$ p-value                         | .360                  | 0.092 | 0.016 | 0.066  | .782    |       |       | .838  |
|                                                                         | Fisher's exact test p-value              |                       |       |       |        |         | 1     | 1     |       |
|                                                                         |                                          | 0%                    | 0.1%  | 0.3%  | 1%     | 3%      | 10%   | 30%   | 0%    |
| <b>Global tests between<br/>females</b>                                 | 4 degrees of freedom $\chi^2$            | 7.191                 |       | 8.778 | 11.521 | 24.874  | 4.349 |       | 9.013 |
|                                                                         | $\chi^2$ p-value                         | .126                  |       | 0.067 | 0.021  | < 0.001 | .361  |       | 0.061 |
|                                                                         | Fisher's exact test p-value              |                       | .256  |       |        |         |       | 0.012 |       |
|                                                                         |                                          | 0%                    | 0.1%  | 0.3%  | 1%     | 3%      | 10%   | 30%   | 0%    |
| <b>Pairwise comparisons<br/>between females<br/>(adjusted p-values)</b> | 5days/unfed 5days vs. 5days /unfed 3days |                       |       |       | 1      | 0.007   |       | 1     |       |
|                                                                         | 5days/unfed 5days vs. 5days /fed         |                       |       |       | 0.011  | < 0.001 |       | 0.129 |       |
|                                                                         | 5days/unfed 5days vs. 3days/unfed 3days  |                       |       |       | 1      | 0.112   |       | 1     |       |
|                                                                         | 5days/unfed 5days vs. 3days /fed         |                       |       |       | 1      | < 0.001 |       | 1     |       |
|                                                                         | 5days /unfed 3days vs. 5days/fed         |                       |       |       | 0.237  | 0.583   |       | 1     |       |
|                                                                         | 5days /unfed 3days vs. 3days/unfed 3days |                       |       |       | 1      | 1       |       | 1     |       |
|                                                                         | 5days /unfed 3days vs. 3days/fed         |                       |       |       | 1      | 1       |       | 1     |       |
|                                                                         | 5days /fed vs. 3days/unfed 3days         |                       |       |       | 0.051  | 0.112   |       | 1     |       |
|                                                                         | 5days /fed vs. 3days/fed                 |                       |       |       | 0.295  | 1       |       | 0.246 |       |
| 3days/unfed 3days vs. 3days /fed                                        |                                          |                       |       | 1     | 0.583  |         | 1     |       |       |

Supplementary Table S14. Detailed analysis of data from Supplementary Figure S1B

|                                                 |                                | Sucrose concentration |       |       |         |         |         |       |       |
|-------------------------------------------------|--------------------------------|-----------------------|-------|-------|---------|---------|---------|-------|-------|
|                                                 |                                | 0%                    | 0.1%  | 0.3%  | 1%      | 3%      | 10%     | 30%   | 0%    |
| <b>Global tests</b>                             | 3 degrees of freedom $\chi^2$  | 2.456                 | 2.755 | 5.417 | 17.47   | 37.729  |         |       | 2.779 |
|                                                 | $\chi^2$ p-value               | 0.483                 | 0.431 | 0.144 | < 0.001 | < 0.001 |         |       | 0.427 |
|                                                 | Fisher's exact test p-value    |                       |       |       |         |         | < 0.001 | 0.129 |       |
| <b>Pairwise comparisons (adjusted p-values)</b> | Unfed control vs. unfed random |                       |       |       | 0.335   | 0.844   | 1       |       |       |
|                                                 | Unfed control vs. fed control  |                       |       |       | 0.222   | < 0.001 | 0.115   |       |       |
|                                                 | Unfed control vs. fed random   |                       |       |       | 0.222   | < 0.001 | 0.073   |       |       |
|                                                 | Unfed random vs. fed control   |                       |       |       | 0.005   | < 0.001 | 0.032   |       |       |
|                                                 | Unfed random vs. fed random    |                       |       |       | 0.003   | < 0.001 | 0.006   |       |       |
|                                                 | Fed control vs. fed random     |                       |       |       | 0.728   | 0.887   | 1       |       |       |
|                                                 |                                |                       |       |       |         |         |         |       |       |

**Supplementary Table S15.** Detailed analysis of data from Supplementary Figure S2A.

|                                                 |                                      | Sucrose concentration |       |       |       |       |       |       |       |
|-------------------------------------------------|--------------------------------------|-----------------------|-------|-------|-------|-------|-------|-------|-------|
|                                                 |                                      | 0%                    | 0.1%  | 0.3%  | 1%    | 3%    | 10%   | 30%   | 0%    |
| <b>Global tests</b>                             | 3 degrees of freedom $\chi^2$        |                       |       |       | 3.773 | 1.503 | 2.437 | 1.601 |       |
|                                                 | $\chi^2$ p-value                     |                       |       |       | 0.287 | 0.682 | 0.487 | 0.659 |       |
|                                                 | Fisher's exact test p-value          | 0.055                 | 0.008 | 0.016 |       |       |       |       | 0.209 |
| <b>Pairwise comparisons (adjusted p-values)</b> |                                      | 0%                    | 0.1%  | 0.3%  | 1%    | 3%    | 10%   | 30%   | 0%    |
|                                                 | 1 min, no water vs. 1 min, water     |                       | 0.748 | 1.000 |       |       |       |       |       |
|                                                 | 1 min, no water vs. 10 min, no water |                       | 0.074 | 0.074 |       |       |       |       |       |
|                                                 | 1 min, no water vs. 10 min, water    |                       | 0.698 | 1.000 |       |       |       |       |       |
|                                                 | 1 min, water vs. 10 min, no water    |                       | 0.031 | 0.031 |       |       |       |       |       |
|                                                 | 1 min, water vs. 10 min, water       |                       | 0.506 | 1.000 |       |       |       |       |       |
|                                                 | 10 min, no water vs. 10 min, water   |                       | 0.698 | 0.204 |       |       |       |       |       |

**Supplementary Table S16.** Detailed analysis of data from Supplementary Figure S2B.

|                                               |                              | Sucrose concentration |         |         |         |         |       |     |         |
|-----------------------------------------------|------------------------------|-----------------------|---------|---------|---------|---------|-------|-----|---------|
|                                               |                              | 0%                    | 0.1%    | 0.3%    | 1%      | 3%      | 10%   | 30% | 0%      |
| <b>Antennal stimulated vs. leg stimulated</b> | 1 degree of freedom $\chi^2$ |                       | 11.335  | 21.506  | 25.029  | 23.720  | 9.287 |     | 11.335  |
|                                               | $\chi^2$ p-value             |                       | < 0.001 | < 0.001 | < 0.001 | < 0.001 | 0.002 |     | < 0.001 |
|                                               | Fisher's exact test p-value  | 0.005                 |         |         |         |         |       |     | 0.005   |
|                                               |                              | 0%                    | 0.1%    | 0.3%    | 1%      | 3%      | 10%   | 30% | 0%      |
| <b>Antennal stimulation in both groups</b>    | 1 degree of freedom $\chi^2$ | 1.422                 | 0.173   | 1.266   | 0.168   |         |       |     | 0.002   |
|                                               | $\chi^2$ p-value             | 0.233                 | 0.677   | 0.260   | 0.681   |         |       |     | 0.966   |
|                                               | Fisher's exact test p-value  |                       |         |         |         | .304    | 1     | 1   |         |

Supplementary Table S17. Detailed analysis of data from Supplementary Figure S3.



|                                                        |                              | Sucrose concentration |        |       |       |       |        |       |       |
|--------------------------------------------------------|------------------------------|-----------------------|--------|-------|-------|-------|--------|-------|-------|
|                                                        |                              | 0%                    | 0.1%   | 0.3%  | 1%    | 3%    | 10%    | 30%   | 0%    |
| <b>Comparison before proboscis stimulation</b>         | 1 degree of freedom $\chi^2$ |                       |        | 0.553 | 2.221 | 0.461 | 0.076  | 0.458 |       |
|                                                        | $\chi^2$ p-value             |                       |        | 0.457 | 0.136 | 0.497 | 0.782  | 0.499 |       |
|                                                        | Fisher's exact test p-value  | 1                     | 0.4717 |       |       |       |        |       | 0.669 |
|                                                        |                              | 0%                    | 0.1%   | 0.3%  | 1%    | 3%    | 10%    | 30%   | 0%    |
| <b>Comparison before and after water stimulation</b>   | McNemar's test               | 0                     | 0      | 0     | 0     | 0     | 0      | 0     | 0     |
|                                                        | McNemar's test p-value       | 1                     | 1      | 1     | 1     | 1     | 1      | 1     | 1     |
|                                                        |                              | 0%                    | 0.1%   | 0.3%  | 1%    | 3%    | 10%    | 30%   | 0%    |
| <b>Comparison before and after quinine stimulation</b> | McNemar's test               | 1.000                 | 1.000  | 1.286 | 4.500 | 4.000 | 10.667 | 8.758 | 2.000 |
|                                                        | McNemar's test p-value       | 0.317                 | 0.317  | 0.257 | 0.034 | 0.046 | 0.0011 | 0.003 | 0.157 |

**Supplementary Table S18.** Detailed analysis of data from Supplementary Figure S4A.

|                    |                              | Sucrose concentration |       |       |         |         |         |         |       |
|--------------------|------------------------------|-----------------------|-------|-------|---------|---------|---------|---------|-------|
|                    |                              | 0%                    | 0.1%  | 0.3%  | 1%      | 3%      | 10%     | 30%     | 0%    |
| <b>Global test</b> | 1 degree of freedom $\chi^2$ |                       |       |       | 21.948  | 64.669  | 84.953  | 69.622  |       |
|                    | $\chi^2$ p-value             |                       |       |       | < 0.001 | < 0.001 | < 0.001 | < 0.001 |       |
|                    | Fisher's exact test p-value  | 1                     | 0.010 | 0.023 |         |         |         |         | 0.050 |

**Supplementary Table S19.** Detailed analysis of data from Supplementary Figure S4B.

|                                                 |                               | Sugar concentration |        |         |         |       |        |       |       |
|-------------------------------------------------|-------------------------------|---------------------|--------|---------|---------|-------|--------|-------|-------|
|                                                 |                               | 0%                  | 0.1%   | 0.3%    | 1%      | 3%    | 10%    | 30%   | 0%    |
| <b>Global tests</b>                             | 3 degrees of freedom $\chi^2$ |                     | 10.278 | 22.271  | 23.397  | 7.031 | 10.607 |       |       |
|                                                 | $\chi^2$ p-value              |                     | 0.006  | < 0.001 | < 0.001 | 0.030 | 0.005  |       |       |
|                                                 | Fisher's exact test p-value   | 0.189               |        |         |         |       |        | 0.012 | 1.000 |
| <b>Pairwise comparisons (adjusted p-values)</b> |                               | 0%                  | 0.1%   | 0.3%    | 1%      | 3%    | 10%    | 30%   | 0%    |
|                                                 | Sucrose vs. Fructose          |                     | 0.666  | 0.021   | 0.055   | 0.122 | 0.004  | 0.064 |       |
|                                                 | Sucrose vs. Sucrose/Fructose  |                     | 0.025  | 0.017   | 0.005   | 0.528 | 0.122  | 1.000 |       |
|                                                 | Fructose vs. Sucrose/Fructose |                     | 0.094  | < 0.001 | < 0.001 | 0.037 | 0.195  | 0.064 |       |

**Supplementary Table S20.** Detailed analysis of data from Supplementary Figure S5A.

|                                                 |                               | Sugar concentration |       |       |         |         |         |         |       |
|-------------------------------------------------|-------------------------------|---------------------|-------|-------|---------|---------|---------|---------|-------|
|                                                 |                               | 0%                  | 0.1%  | 0.3%  | 1%      | 3%      | 10%     | 30%     | 0%    |
| <b>Global tests</b>                             | 3 degrees of freedom $\chi^2$ | 2.325               | 2.654 | 4.010 | 18.537  | 40.929  | 52.69   |         | 7.935 |
|                                                 | $\chi^2$ p-value              | .312                | .265  | .135  | < 0.001 | < 0.001 | < 0.001 |         | 0.019 |
|                                                 | Fisher's exact test p-value   |                     |       |       |         |         |         | < 0.001 |       |
|                                                 |                               | 0%                  | 0.1%  | 0.3%  | 1%      | 3%      | 10%     | 30%     | 0%    |
| <b>Pairwise comparisons (adjusted p-values)</b> | Sucrose vs. Glucose           |                     |       |       | < 0.001 | < 0.001 | < 0.001 | < 0.001 | 0.033 |
|                                                 | Sucrose vs. Sucrose/Glucose   |                     |       |       | 0.854   | .634    | .685    | 1       | 0.805 |
|                                                 | Glucose vs. Sucrose/Glucose   |                     |       |       | < 0.001 | < 0.001 | < 0.001 | < 0.001 | 0.021 |

**Supplementary Table S21.** Detailed analysis of data from Supplementary Figure S5B.

|                                                 |                               | Sugar concentration |      |      |       |         |         |       |       |
|-------------------------------------------------|-------------------------------|---------------------|------|------|-------|---------|---------|-------|-------|
|                                                 |                               | 0%                  | 0.1% | 0.3% | 1%    | 3%      | 10%     | 30%   | 0%    |
| <b>Global tests</b>                             | 3 degrees of freedom $\chi^2$ |                     |      |      | 3.826 | 20.333  | 20.935  | 7.571 | 1.128 |
|                                                 | $\chi^2$ p-value              |                     |      |      | .148  | < 0.001 | < 0.001 | 0.023 | .569  |
|                                                 | Fisher's exact test p-value   | .178                | .684 | .668 |       |         |         |       |       |
| <b>Pairwise comparisons (adjusted p-values)</b> |                               | 0%                  | 0.1% | 0.3% | 1%    | 3%      | 10%     | 30%   | 0%    |
|                                                 | Fructose vs. Glucose          |                     |      |      |       | < 0.001 | < 0.001 | 0.210 |       |
|                                                 | Glucose vs. Fructose/Glucose  |                     |      |      |       | 0.002   | < 0.001 | 0.043 |       |
|                                                 | Fructose vs. Fructose/Glucose |                     |      |      |       | 0.135   | 0.834   | 0.490 |       |

**Supplementary Table S22.** Detailed analysis of data from Supplementary Figure S5C.

|                                                 |                               | Sugar concentration |       |        |         |         |         |         |         |
|-------------------------------------------------|-------------------------------|---------------------|-------|--------|---------|---------|---------|---------|---------|
|                                                 |                               | 0%                  | 0.1%  | 0.3%   | 1%      | 3%      | 10%     | 30%     | 0%      |
| <b>Global tests</b>                             | 4 degrees of freedom $\chi^2$ | 1.817               | 2.082 | 10.311 | 23.251  | 58.748  | 34.012  |         | 3.958   |
|                                                 | $\chi^2$ p-value              | 0.611               | 0.556 | 0.016  | < 0.001 | < 0.001 | < 0.001 |         | 0.266   |
|                                                 | Fisher's exact test p-value   |                     |       |        |         |         |         |         | < 0.001 |
| <b>Pairwise comparisons (adjusted p-values)</b> |                               | 0%                  | 0.1%  | 0.3%   | 1%      | 3%      | 10%     | 30%     | 0%      |
|                                                 | Sucrose vs. Glucose           |                     |       | 0.194  | < 0.001 | < 0.001 | < 0.001 | < 0.001 |         |
|                                                 | Sucrose vs. Fructose          |                     |       | 0.031  | 0.030   | 0.033   | 0.800   | 0.728   |         |
|                                                 | Sucrose vs. Mixture           |                     |       | 1.000  | 0.360   | 0.279   | 0.918   | 0.728   |         |
|                                                 | Glucose vs. Fructose          |                     |       | 1.000  | 0.141   | < 0.001 | < 0.001 | 0.026   |         |
|                                                 | Glucose vs. Mixture           |                     |       | 0.616  | 0.001   | < 0.001 | < 0.001 | 0.026   |         |
| Fructose vs. Mixture                            |                               |                     | 0.180 | 0.141  | 0.279   | 0.918   | 1.000   |         |         |

**Supplementary Table S23.** Detailed analysis of data from Supplementary Figure S5D.

|                                                                 |                                               | Sugar concentration |       |       |         |         |         |       |       |
|-----------------------------------------------------------------|-----------------------------------------------|---------------------|-------|-------|---------|---------|---------|-------|-------|
|                                                                 |                                               | 0%                  | 0.1%  | 0.3%  | 1%      | 3%      | 10%     | 30%   | 0%    |
| <b>Males vs. females (sucrose)</b>                              | 1 degree of freedom $\chi^2$                  |                     | 0.212 | 0.012 | 0.647   | 0.014   |         |       | 1.007 |
|                                                                 | $\chi^2$ p-value                              |                     | .645  | .913  | .421    | .907    |         |       | .316  |
|                                                                 | Fisher's exact test p-value                   | 0.057               |       |       |         |         | 0.030   | 0.030 |       |
|                                                                 |                                               | 0%                  | 0.1%  | 0.3%  | 1%      | 3%      | 10%     | 30%   | 0%    |
| <b>Global tests between females</b>                             | 4 degrees of freedom $\chi^2$                 |                     | 1.7   | 4.676 | 30.61   | 65.104  | 66.16   |       | 6.101 |
|                                                                 | $\chi^2$ p-value                              |                     | .791  | .322  | < 0.001 | < 0.001 | < 0.001 |       | 0.192 |
|                                                                 | Fisher's exact test p-value                   | 0.060               |       |       |         |         |         |       | 0.005 |
|                                                                 |                                               | 0%                  | 0.1%  | 0.3%  | 1%      | 3%      | 10%     | 30%   | 0%    |
| <b>Pairwise comparisons between females (adjusted p-values)</b> | Sucrose vs. Fructose                          |                     |       |       | 0.974   | 1.000   | 1.000   | 0.419 |       |
|                                                                 | Sucrose vs. Sucrose/Fructose                  |                     |       |       | 0.974   | 1.000   | 1.000   | 0.113 |       |
|                                                                 | Sucrose vs. Sucrose/Fructose/Glucose          |                     |       |       | 0.249   | 1.000   | 1.000   | 0.853 |       |
|                                                                 | Sucrose vs. Glucose                           |                     |       |       | 0.003   | < 0.001 | < 0.001 | 1.000 |       |
|                                                                 | Fructose vs. Sucrose/Fructose                 |                     |       |       | 0.292   | 1.000   | 1.000   | 1.000 |       |
|                                                                 | Fructose vs. Sucrose/Fructose/Glucose         |                     |       |       | 0.035   | 1.000   | 1.000   | 1.000 |       |
|                                                                 | Fructose vs. Glucose                          |                     |       |       | 0.027   | < 0.001 | < 0.001 | 0.390 |       |
|                                                                 | Sucrose/Fructose vs. Sucrose/Fructose/Glucose |                     |       |       | 0.974   | 1.000   | 1.000   | 1.000 |       |
|                                                                 | Sucrose/Fructose vs. Glucose                  |                     |       |       | < 0.001 | < 0.001 | < 0.001 | 0.089 |       |
| Sucrose/Fructose/Glucose vs. Glucose                            |                                               |                     |       | 0.000 | 0.000   | 0.000   | 0.853   |       |       |

Supplementary Table S24. Detailed analysis of data from Supplementary Figure S6.
